# Supplementary material for: Upgrading the reflux method as novel route for competitive catalysts in alkane selective oxidation
Source: Royal Society of Chemistry journal article supplement (doi:10.1039/d3cy00372h), 2023-01-01
Supplement: d3cy00372h1.pdf [file d3cy00372h1.pdf]

## Supporting information

### Upgrading the Reflux Method as Novel Route for Competitive Catalysts in Alkane Selective Oxidation

by

Amada Massó Ramírez,<sup>1</sup> Agustín de Arriba,<sup>1</sup> Francisco Ivars-Barceló,<sup>2</sup> Adel Ykrelef,<sup>3,4</sup>  
Benjamín Solsona,<sup>3\*</sup> Jose M. López Nieto <sup>1,\*</sup>

<sup>1</sup>) Instituto de Tecnología Química, Universitat Politècnica de València-Consejo Superior de Investigaciones Científicas, Avenida de los Naranjos s/n, 46022 Valencia, Spain.

<sup>2</sup>) Departamento Química Inorgánica y Química Técnica, Facultad de Ciencias de la UNED, Paseo Senda del Rey nº 9, 28040 Madrid, Spain.

<sup>3</sup>) Departament d'Enginyeria Química, Universitat de València, C/ Dr. Moliner 50, 46100 Burjassot, Valencia, Spain.

<sup>4</sup>) Hydrogen Energy Applications Laboratory, Head of Process Engineering Degree, GP Department, University of Blida 1

\* To whom correspondence should be addressed:

Email address: [jmlopez@itq.upv.es](mailto:jmlopez@itq.upv.es); [benjamin.solsona@uv.es](mailto:benjamin.solsona@uv.es)

## Summary

**Table S1.** Rietveld method quantification of the majority crystalline phases present in the XRD of the catalysts.

**Table S2.** Catalytic results during the partial oxidation of propane over MoVTeNbO catalysts.<sup>a</sup>

**Table S3.** Catalytic results during the ethane oxidative dehydrogenation over MoVTeNbO catalysts.<sup>a</sup>

**Table S4.** Catalytic parameters during the oxidation of ethane and propane over MoVTeNbO catalysts.<sup>a</sup>

**Figure S1.** XRD patterns of as-synthesized materials. Characteristics of catalysts as in Table 1.

**Figure S2.** IR spectra of as-synthesized materials. Characteristics of catalysts as in Table 1.

**Figure S3.** Low magnification (10K) FESEM micrographs of: a) **P8-N**, b) **P10-N**, c) **P11-N**, d) **P11A-N**, e) **P11B-N** and f) **P11C-AN** catalysts.

**Figure S4.** HRTEM micrographs of: a) **P8-N**, b) **P11-N**, c) **P11A-N** and d) **P11C-AN** catalysts.

**Figure S5.** XPS spectra of Mo *3d* (**A, B**), Te *3d* (**C, D**) and Nb *3d* (**E, F**) core level.

**Figure S6.** Relationship between the areal rate for both propane (**A**) and ethane (**B**) oxidation and the % of the orthorhombic M1 phase in the catalysts. Reaction conditions as in Table S4.

**Figure S7.** Relationship between the selectivity to ethylene and the % of the orthorhombic M1 phase in the catalysts. Reaction conditions: 25% conversion, 412 °C and remaining conditions in the text.

**Scheme S1.** Reaction network for the selective oxidation of propane on mixed metal oxides. Adapted from ref. 1.

**Scheme S2.** Reaction network for the ethane ODH on mixed metal oxides. Adapted from ref. 2

## References

**Table S1.** Rietveld method quantification of the majority crystalline phases present in the XRD of the catalysts.

| <b>Catalyst<sup>a</sup></b> | <b>M1</b> | <b>Mo<sub>5</sub>O<sub>14</sub></b> | <b>TeMo<sub>5</sub>O<sub>16</sub></b> | <b>Amorphous</b> |
|-----------------------------|-----------|-------------------------------------|---------------------------------------|------------------|
| <b>P8-N</b>                 | 14.2      | 34.5                                | 40.1                                  | 11.0             |
| <b>P10-N</b>                | 27.3      | 20.1                                | 30.2                                  | 22.3             |
| <b>P11-N</b>                | 66.1      | 12.5                                | 11.8                                  | 9.6              |
| <b>P11A-N</b>               | 76.7      | 9.0                                 | 10.0                                  | 4.3              |
| <b>P11B-N</b>               | 44.6      | 20.4                                | 15.9                                  | 8.1              |
| <b>P11C-aN</b>              | 73.2      | 1.8                                 | 12.3                                  | 12.6             |

a) Catalyst heat-treated at 600°C in N<sub>2</sub> atmosphere; b) Catalyst initially calcined at 250°C in air and then heat-treated at 600°C in N<sub>2</sub> atmosphere.

**Table S2.** Catalytic results during the partial oxidation of propane over MoVTeNbO catalysts.<sup>a</sup>

| <b>Catalyst</b> | <b>Temp.</b><br>(°C) | <b>Conv.</b><br>(%) | <b>S<sub>AA</sub></b><br>(%) | <b>S<sub>C3=</sub></b><br>(%) | <b>S<sub>HAc</sub></b><br>(%) | <b>S<sub>COx</sub></b><br>(%) | <b>Y<sub>AA</sub></b><br>(%) |
|-----------------|----------------------|---------------------|------------------------------|-------------------------------|-------------------------------|-------------------------------|------------------------------|
| <b>P8-N</b>     | 375                  | 9.7                 | 28.4                         | 16.5                          | 7.1                           | 48.0                          | 2.8                          |
| <b>P10-N</b>    | 391                  | 18.5                | 54.9                         | 10.8                          | 3.4                           | 30.9                          | 10.1                         |
| <b>P11-N</b>    | 372                  | 21.2                | 55.5                         | 10.2                          | 3.9                           | 30.4                          | 11.8                         |
|                 | 400                  | 40.5                | 57.0                         | 5.3                           | 6.0                           | 31.7                          | 23.1                         |
| <b>P11A-N</b>   | 380                  | 56.7                | 63.2                         | 2.1                           | 2.8                           | 25.9                          | 35.8                         |
|                 | 400                  | 70.5                | 58.5                         | 1.5                           | 9.0                           | 31.0                          | 41.2                         |
| <b>P11B-N</b>   | 372                  | 29.9                | 36.9                         | 10.9                          | 2.2                           | 50.0                          | 11.0                         |
| <b>P11C-aN</b>  | 380                  | 60.7                | 63.7                         | 1.7                           | 8.5                           | 26.1                          | 38.7                         |
|                 | 400 <sup>b</sup>     | 50.6                | 64.0                         | 1.7                           | 8.4                           | 25.9                          | 32.4                         |
|                 | 400                  | 74.4                | 59.0                         | 1.5                           | 8.8                           | 30.7                          | 43.9                         |

**a)** Reaction conditions: Contact time, W/F, 407 g<sub>cat</sub> h<sup>-1</sup> mol<sub>C<sub>3</sub>H<sub>8</sub></sub><sup>-1</sup>; C<sub>3</sub>H<sub>8</sub>/O<sub>2</sub>/H<sub>2</sub>O/He= 4/8/30/58; total flow 25 mL min<sup>-1</sup>.

**b)** Selectivity to acrylic acid (AA), acetic acid (HAc), propylene (C3=), and carbon oxides (CO+CO<sub>2</sub>).

**c)** Contact time, W/F, 203 g<sub>cat</sub> h<sup>-1</sup> mol<sub>C<sub>3</sub>H<sub>8</sub></sub><sup>-1</sup>; C<sub>3</sub>H<sub>8</sub>/O<sub>2</sub>/H<sub>2</sub>O/He= 4/8/30/58; total flow 50 mL min<sup>-1</sup>.

**Table S3.** Catalytic results during the ethane oxidative dehydrogenation over MoVTeNbO catalysts.<sup>a</sup>

| <b>Catalyst</b> | <b>Temp.</b><br>(°C) | <b>Conversion</b><br>(%) | <b>S<sub>C<sub>2</sub>H<sub>4</sub></sub></b><br>(%) | <b>S<sub>CO</sub></b><br>(%) | <b>S<sub>CO<sub>2</sub></sub></b><br>(%) | <b>Y<sub>C<sub>2</sub>H<sub>4</sub></sub></b><br>(%) |
|-----------------|----------------------|--------------------------|------------------------------------------------------|------------------------------|------------------------------------------|------------------------------------------------------|
| <b>P8-N</b>     | 412                  | 5.5                      | 90.6                                                 | 6.2                          | 3.2                                      |                                                      |
|                 | 433                  | 7.6                      | 92.4                                                 | 5.0                          | 2.6                                      | 7.0                                                  |
| <b>P10-N</b>    | 408                  | 11.9                     | 94.1                                                 | 4.0                          | 1.9                                      | 11.2                                                 |
|                 | 428                  | 18.5                     | 93.4                                                 | 4.7                          | 2.0                                      | 17.2                                                 |
| <b>P11-N</b>    | 408                  | 12.4                     | 95.4                                                 | 3.0                          | 1.6                                      | 11.8                                                 |
|                 | 428                  | 19.4                     | 94.7                                                 | 3.5                          | 1.8                                      | 18.3                                                 |
| <b>P11A-N</b>   | 386                  | 26.2                     | 96.1                                                 | 2.3                          | 1.7                                      | 25.2                                                 |
|                 | 407                  | 39.1                     | 94.8                                                 | 3.2                          | 2.0                                      | 37.1                                                 |
|                 | 429                  | 54.2                     | 92.4                                                 | 4.8                          | 2.7                                      | 50.1                                                 |
| <b>P11B-N</b>   | 408                  | 16.4                     | 93.7                                                 | 4.3                          | 2.0                                      | 15.4                                                 |
|                 | 428                  | 25.7                     | 92.5                                                 | 5.3                          | 2.2                                      | 23.7                                                 |
| <b>P11C-aN</b>  | 391                  | 34.3                     | 94.3                                                 | 3.8                          | 1.9                                      | 32.3                                                 |
|                 | 412                  | 49.6                     | 92.7                                                 | 5.0                          | 3.1                                      | 46.0                                                 |
|                 | 432                  | 65.3                     | 89.4                                                 | 7.5                          | 4.3                                      | 58.4                                                 |

a) Reaction conditions: C<sub>2</sub>H<sub>6</sub>/O<sub>2</sub>/He= 9/35/56; contact time, W/F, of 140 g<sub>cat</sub> h<sup>-1</sup> mol<sub>C<sub>2</sub>H<sub>6</sub></sub><sup>-1</sup>; total flow 30 mL min<sup>-1</sup>.

b) Selectivity to ethylene (C<sub>2</sub>H<sub>4</sub>), and carbon oxides (CO and CO<sub>2</sub>).

**Table S4.** Catalytic parameters during the oxidation of ethane and propane over MoVTeNbO catalysts.<sup>a</sup>

| Catalyst <sup>a</sup> | Propane oxidation       |                                               | Ethane oxidation        |                                               |
|-----------------------|-------------------------|-----------------------------------------------|-------------------------|-----------------------------------------------|
|                       | Areal rate <sup>b</sup> | Rate per area and per M1-content <sup>c</sup> | Areal rate <sup>b</sup> | Rate per area and per M1-content <sup>c</sup> |
| <b>P8-N</b>           | 2.57                    | 18.0                                          | 2.63                    | 18.5                                          |
| <b>P10-N</b>          | 3.71                    | 13.6                                          | 4.56                    | 16.7                                          |
| <b>P11-N</b>          | 9.14                    | 13.4                                          | 9.66                    | 14.7                                          |
| <b>P11A-N</b>         | 9.83                    | 12.8                                          | 14.3                    | 18.6                                          |
| <b>P11B-N</b>         | 5.72                    | 12.8                                          | 5.82                    | 13.1                                          |
| <b>P11C-aN</b>        | 7.36                    | 10.1                                          | 16.0                    | 21.8                                          |

<sup>a</sup> Reaction conditions as in Table S2 (at 380°C) and S3 (at 412°C); <sup>b</sup> Areal rate in  $\text{g}_{\text{C}_3} \text{m}^{-2} \text{h}^{-1}$  or  $\text{g}_{\text{C}_2} \text{m}^{-2} \text{h}^{-1}$ ; <sup>c</sup> Rate per area and per M1-content has been obtained by dividing the areal rate by %/100 of M1 in the catalyst.

**Figure S1.** XRD patterns of as-synthesized materials a) P8-as; b) P10-as; c) P11-as; d) P11A-as; e) P11B-as; f) P11C-as. Characteristics of catalysts as in **Table 1**.

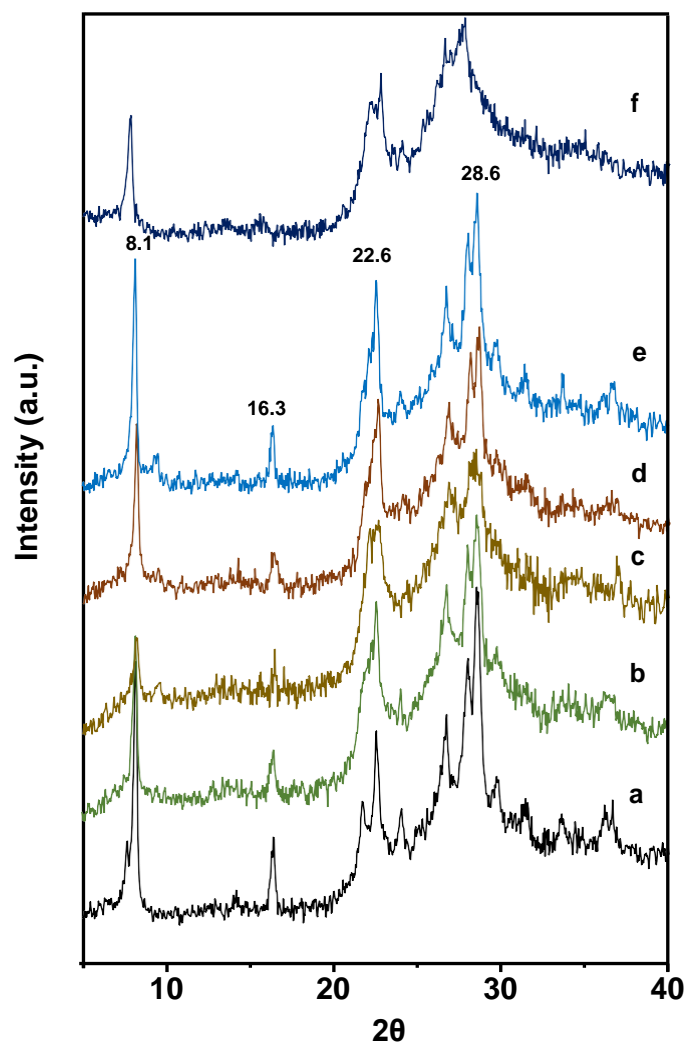

**Figure S2.** Infrared spectra of as-synthesized materials: a) P11-as; b) P11A-as; c) P11B-as; d) P11C-as. Characteristics of catalysts as in **Table 1**.

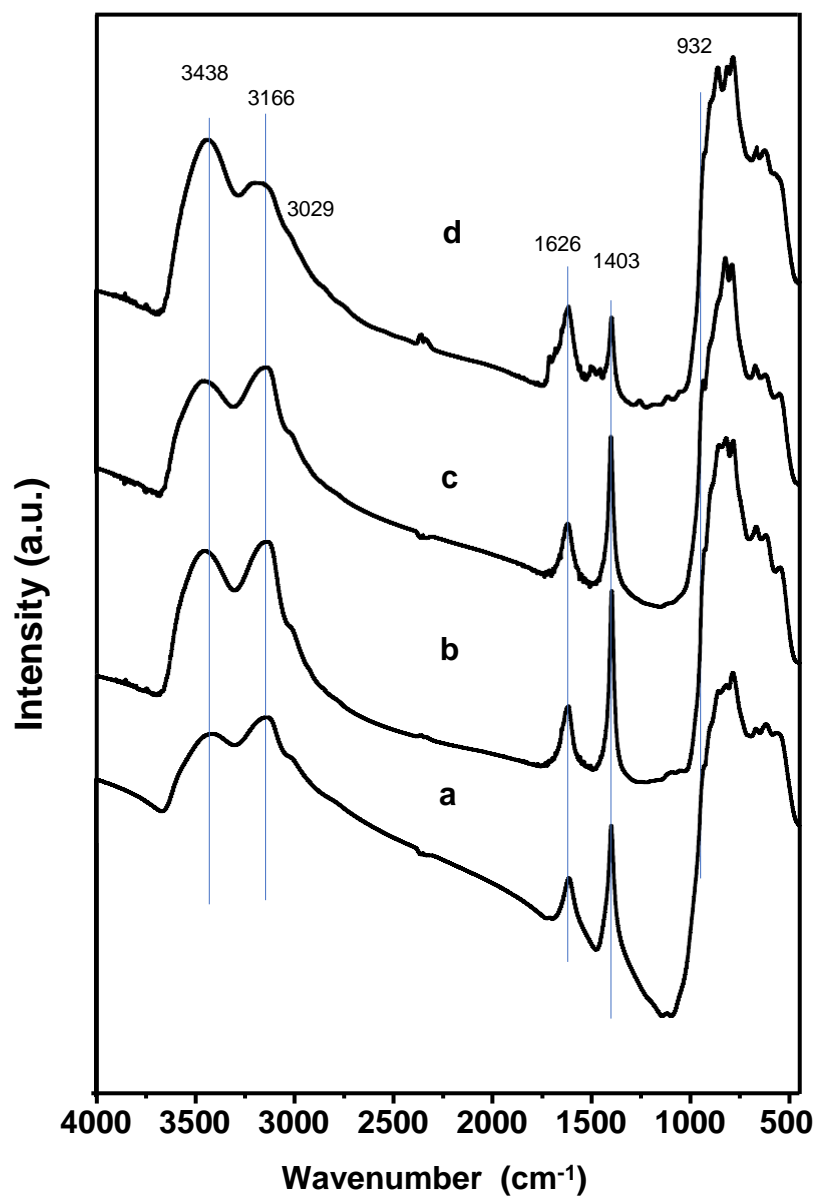



Figure S3. Low magnification FESEM micrographs of: a) **P8-N**, b) **P10-N**, c) **P11-N**, d) **P11A-N**, e) **P11B-N** and f) **P11C-aN** catalysts.

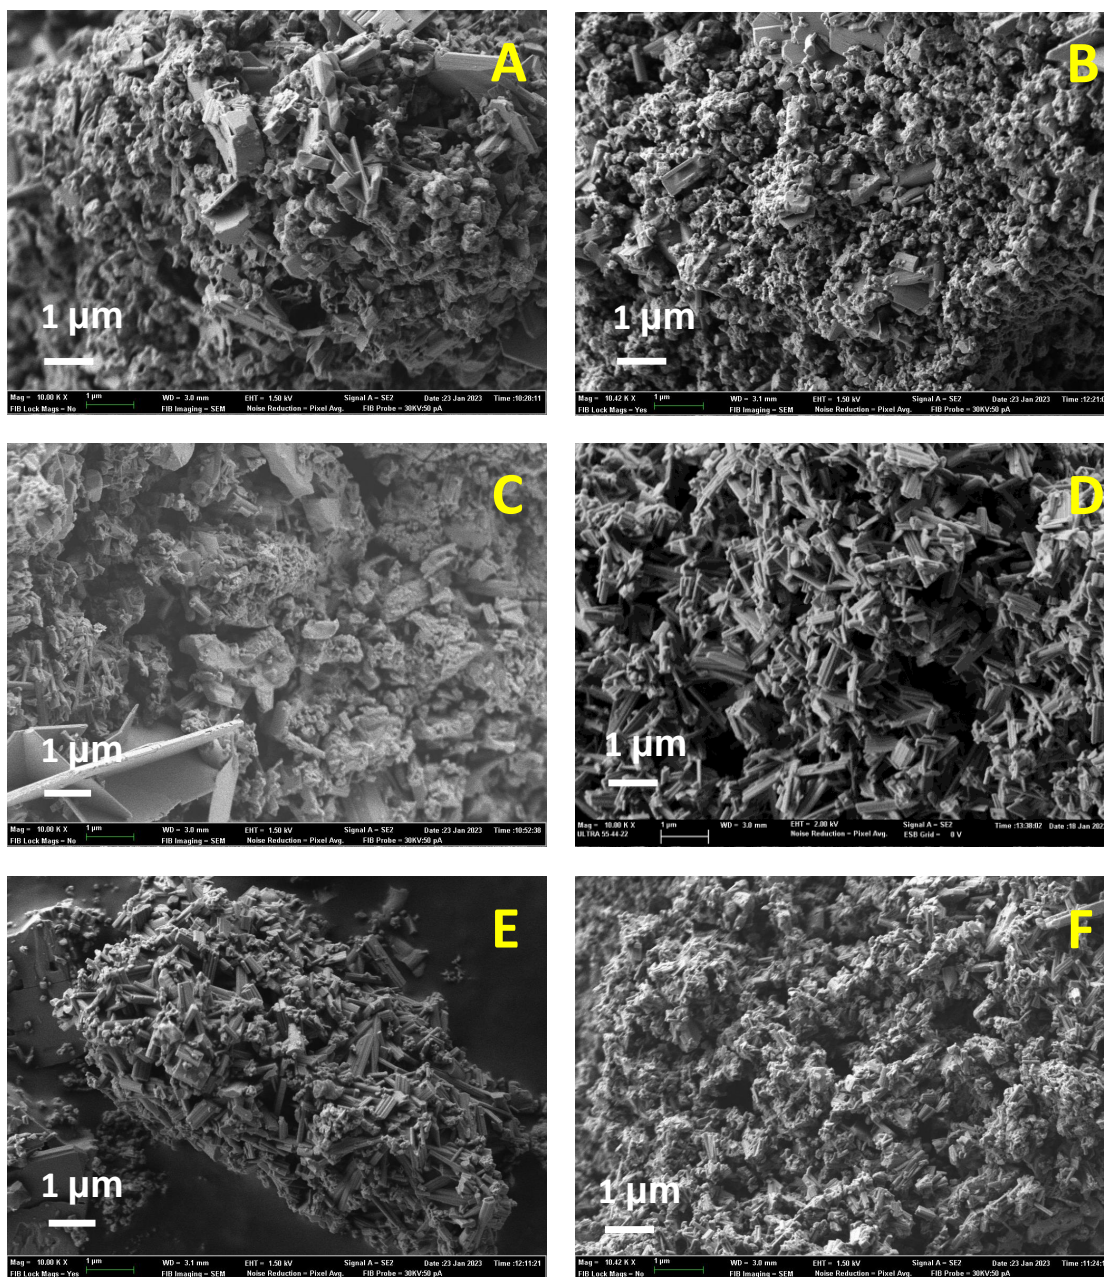

Figure S4. HRTEM micrographs of: a) **P8-N**, b) **P11-N**, c) **P11A-N** and d) **P11C-aN** catalysts.

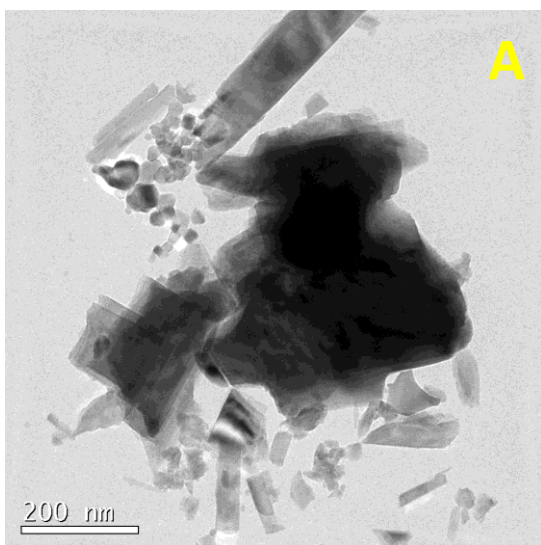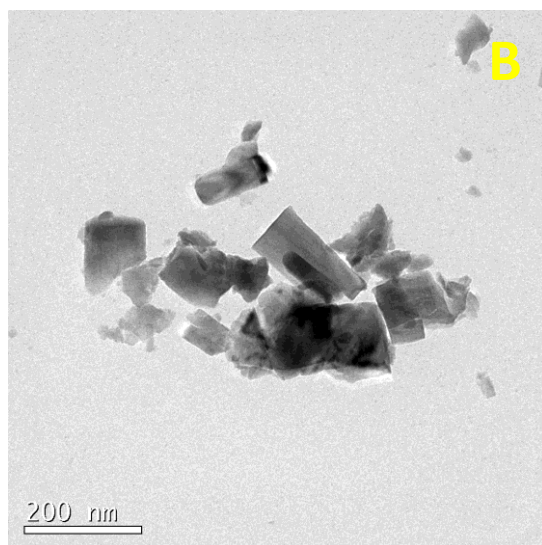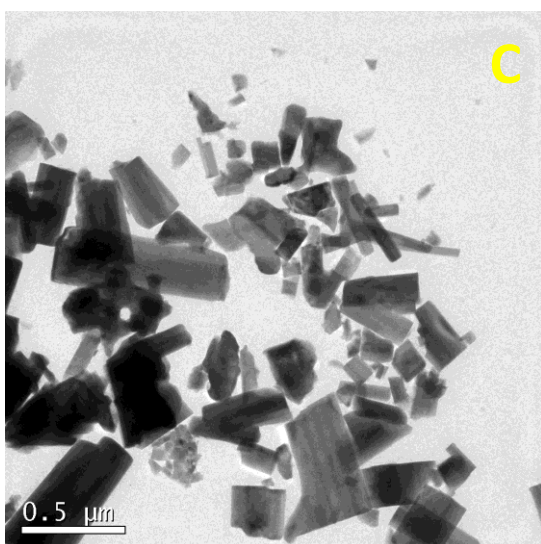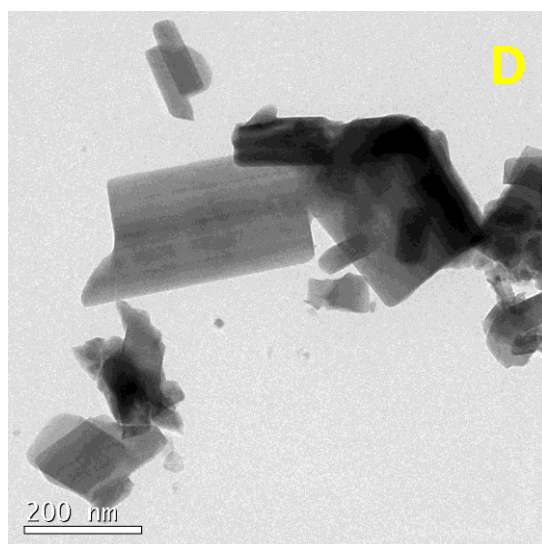

Figure S5. XPS spectra of Mo 3d (A, B), Te 3d (C, D) and Nb 3d (E, F) core level.

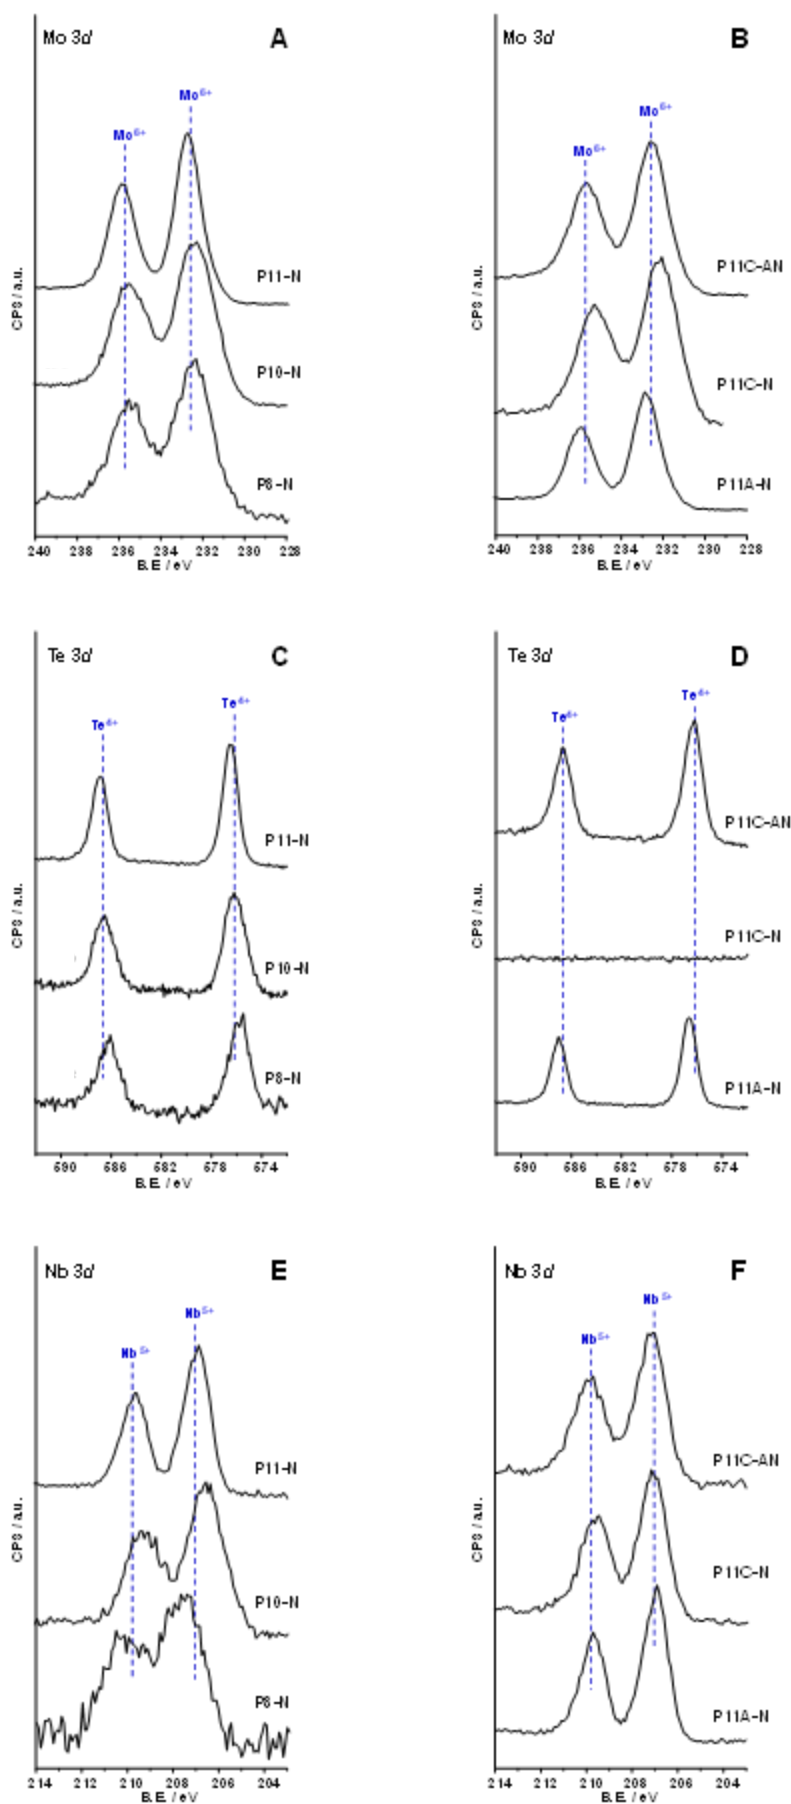

Figure S6. Relationship between the areal rate for both propane (A) and ethane (B) oxidation and the % of the orthorhombic M1 phase in the catalysts. Reaction conditions as in Table S4.

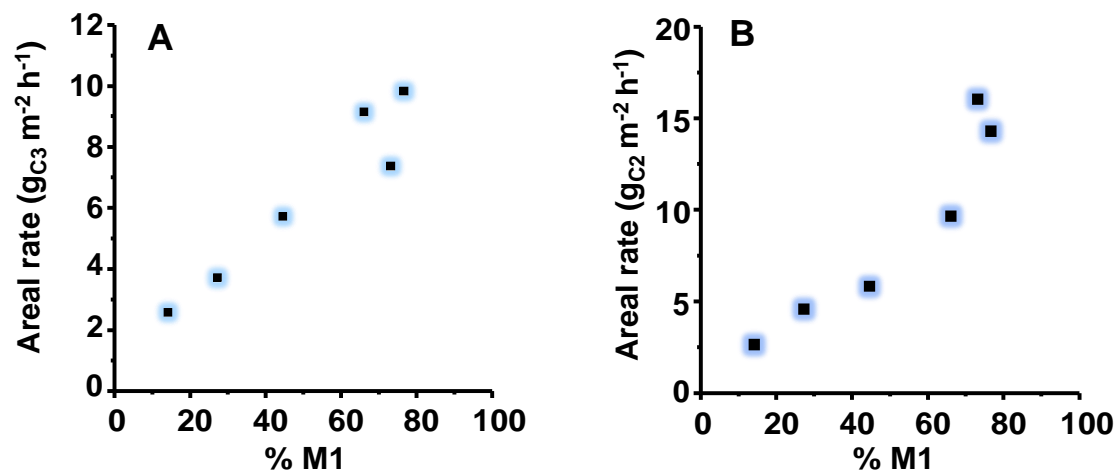

**Figure S7.** Relationship between the selectivity to ethylene and the % of the orthorhombic M1 phase in the catalysts. Reaction conditions: 25% conversion, 412 °C and remaining conditions in the text.

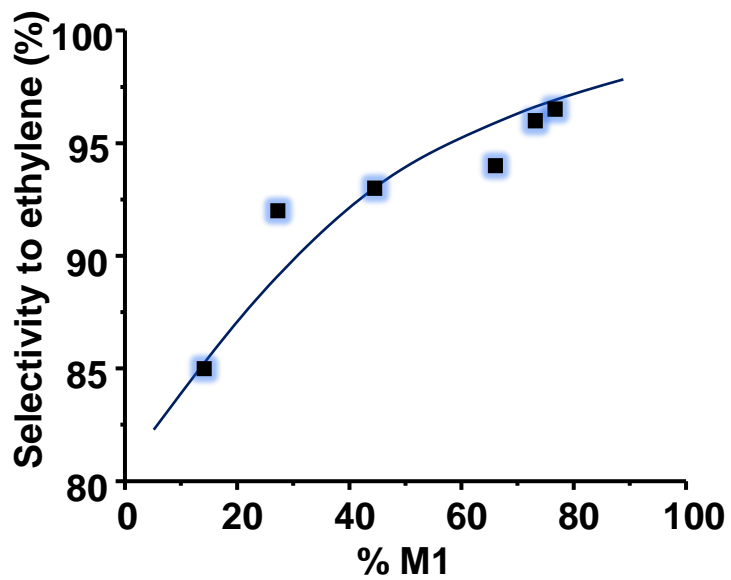

**Scheme S1.** Reaction network for the selective oxidation of propane on mixed metal oxides. Adapted from ref. 1.

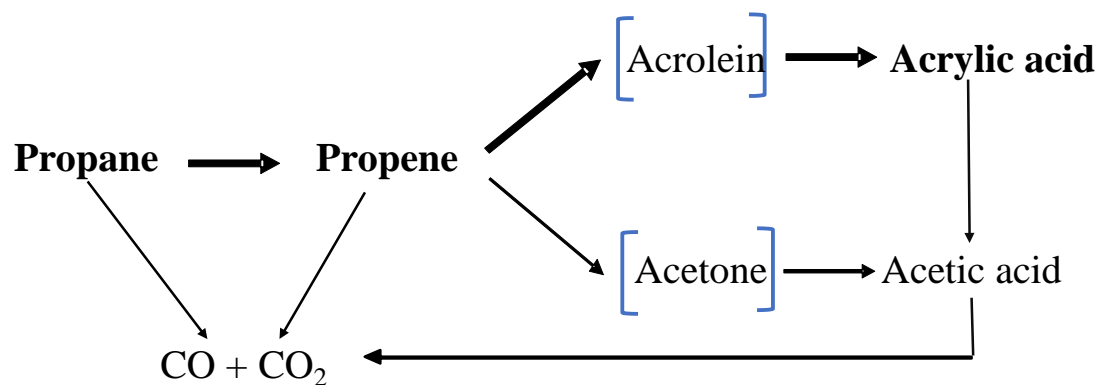

**Scheme S2.** Reaction network for the ethane ODH on mixed metal oxides. Adapted from ref. 2.

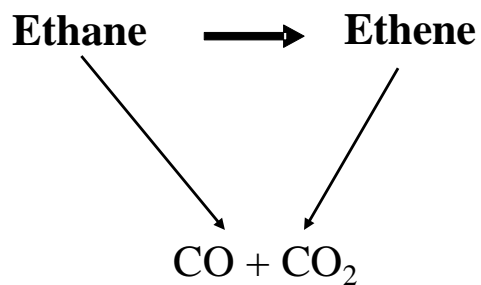

## References

1. P. Concepción, P. Botella, J.M. López Nieto, *Appl. Catal. A- Gen* 278 (2004) 45–5.
2. T. Blasco, J.M. López Nieto, *Appl. Catal. A- Gen* 157 (1997) 117-142.
